# Supplementary material for: Evaluation of a Silver-Embedded Ceramic Tablet as a Primary and Secondary Point-of-Use Water Purification Technology in Limpopo Province, S. Africa
Source: PubMed Central journal article supplement (PMC5240968; doi:10.1371/journal.pone.0169502), 2017-01-17
Supplement: pone.0169502.s001.pdf [file pone.0169502.s001.pdf]

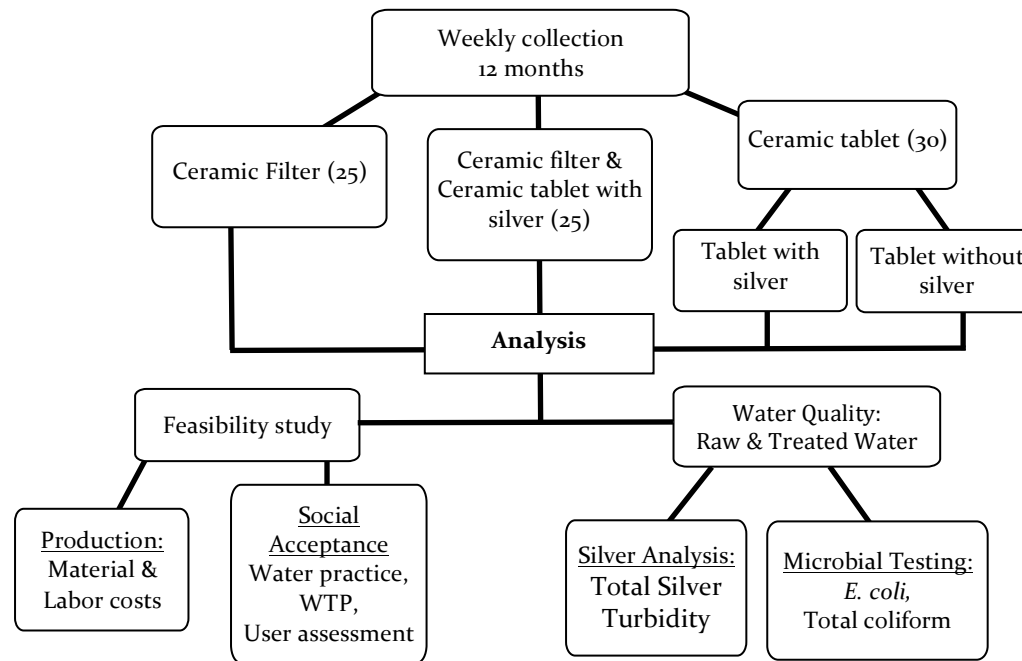

**S1 Fig. Outline of study to evaluate the technological performance of POU methods.**
