# Supplementary material for: Evaluation of a Silver-Embedded Ceramic Tablet as a Primary and Secondary Point-of-Use Water Purification Technology in Limpopo Province, S. Africa
Source: PubMed Central journal article supplement (PMC5240968; doi:10.1371/journal.pone.0169502), 2017-01-17
Supplement: pone.0169502.s002.pdf [file pone.0169502.s002.pdf]

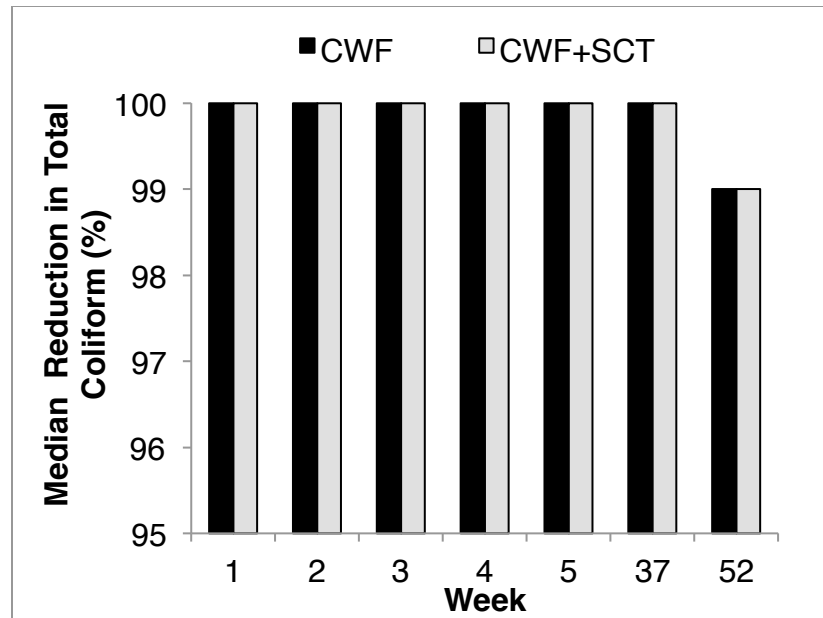

**S2 Fig. Median percent reduction of total coliform bacteria over 12 months.**

The CWF group consisted of 25 households with only ceramic water purification systems. The CWF+SCT group consisted of 25 households with the ceramic water purification system and silver embedded ceramic tablet.
