# Supplementary material for: Evaluation of a Silver-Embedded Ceramic Tablet as a Primary and Secondary Point-of-Use Water Purification Technology in Limpopo Province, S. Africa
Source: PubMed Central journal article supplement (PMC5240968; doi:10.1371/journal.pone.0169502), 2017-01-17
Supplement: pone.0169502.s005.pdf [file pone.0169502.s005.pdf]

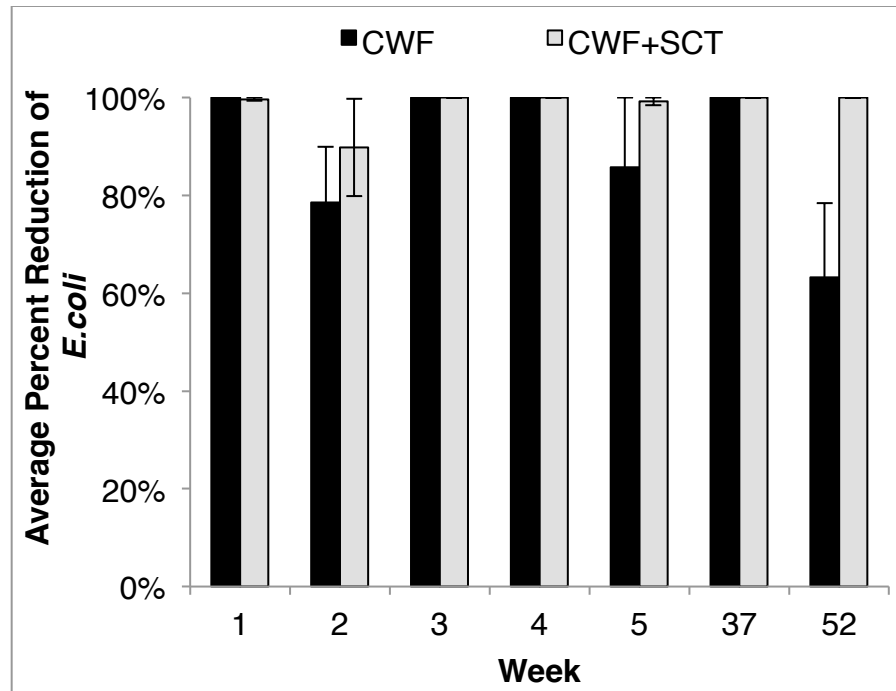

**S5 Fig. Average percent reduction of *E. coli* over time. Households were using ceramic water purification systems (CWF) or ceramic water purification systems with the silver-embedded ceramic tablet (CWF+SCT). Data points represent average and error bars represent standard error.**
