# Supplementary material for: Evaluation of a Silver-Embedded Ceramic Tablet as a Primary and Secondary Point-of-Use Water Purification Technology in Limpopo Province, S. Africa
Source: PubMed Central journal article supplement (PMC5240968; doi:10.1371/journal.pone.0169502), 2017-01-17
Supplement: pone.0169502.s007.pdf [file pone.0169502.s007.pdf]

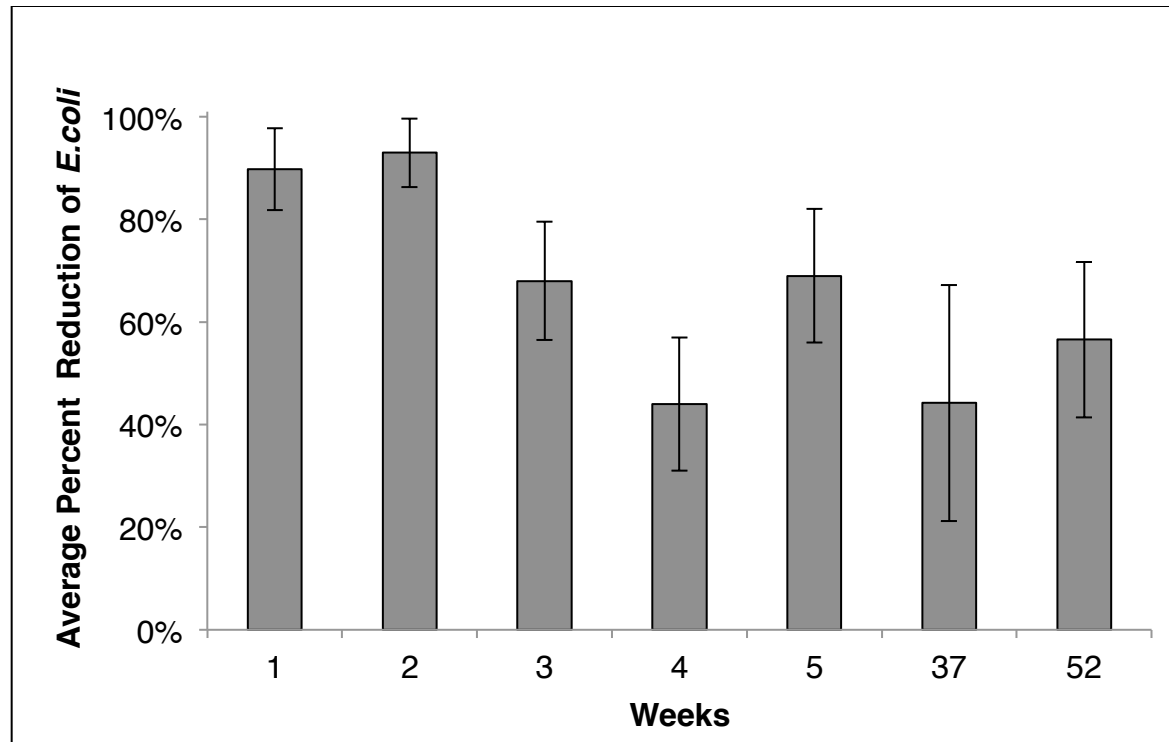

**S7 Fig. Percent reduction of *E. coli* over time. Households were using silver-embedded ceramic tablet (SCT) as primary water purification method.**

Data points represent average and error bars represent standard error. Percent reduction was determined by comparing *E. coli* concentrations in water storage containers treated with control ceramic tablets to those treated with silver-embedded ceramic tablets. Samples were taken in duplicate among 29 households over 12 months. Data points represent the median of all samples.
