# Supplementary material for: Evaluation of a Silver-Embedded Ceramic Tablet as a Primary and Secondary Point-of-Use Water Purification Technology in Limpopo Province, S. Africa
Source: PubMed Central journal article supplement (PMC5240968; doi:10.1371/journal.pone.0169502), 2017-01-17
Supplement: pone.0169502.s010.pdf [file pone.0169502.s010.pdf]

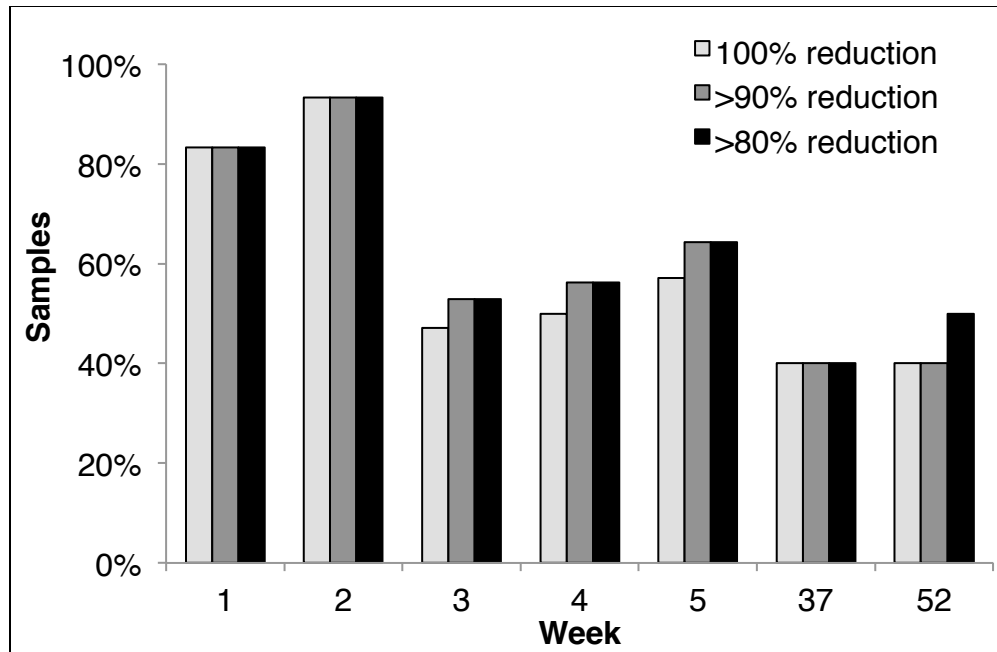

**S10 Fig. Percent of ceramic tablet-treated samples with at least 80, 90 and 100% reduction in *E. coli* over 12 months.**
