# Supplementary material for: Evaluation of a Silver-Embedded Ceramic Tablet as a Primary and Secondary Point-of-Use Water Purification Technology in Limpopo Province, S. Africa
Source: PubMed Central journal article supplement (PMC5240968; doi:10.1371/journal.pone.0169502), 2017-01-17
Supplement: pone.0169502.s015.pdf [file pone.0169502.s015.pdf]

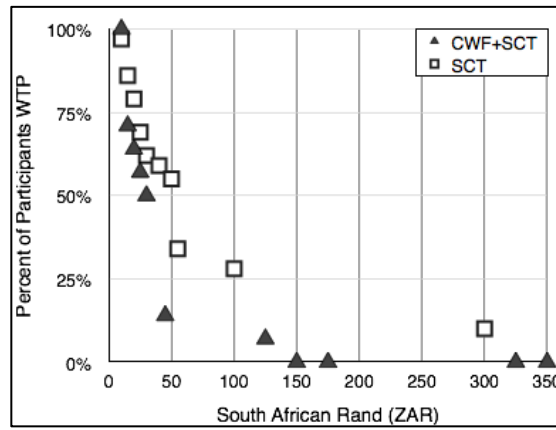

**S15 Fig. Comparison of willingness-to-pay for SCT among households using SCT as primary POU method (SCT) and as secondary POU method (CWF+SCT).**
