# Supplementary material for: Evaluation of a Silver-Embedded Ceramic Tablet as a Primary and Secondary Point-of-Use Water Purification Technology in Limpopo Province, S. Africa
Source: PubMed Central journal article supplement (PMC5240968; doi:10.1371/journal.pone.0169502), 2017-01-17
Supplement: pone.0169502.s016.pdf [file pone.0169502.s016.pdf]

**S1 Table. Number of Households sampled each week in CWF-only and CWF-SCT households**

| <b>Week</b> | <b>Control Households</b> | <b>Intervention Households</b> | <b>Total Households</b> |
|-------------|---------------------------|--------------------------------|-------------------------|
| <b>1</b>    | 21                        | 24                             | 45                      |
| <b>2</b>    | 24                        | 23                             | 47                      |
| <b>3</b>    | 22                        | 22                             | 44                      |
| <b>4</b>    | 22                        | 24                             | 46                      |
| <b>5</b>    | 26                        | 21                             | 47                      |
| <b>37</b>   | 10                        | 10                             | 20                      |
| <b>52</b>   | 18                        | 11                             | 29                      |
