# Supplementary material for: Evaluation of a Silver-Embedded Ceramic Tablet as a Primary and Secondary Point-of-Use Water Purification Technology in Limpopo Province, S. Africa
Source: PubMed Central journal article supplement (PMC5240968; doi:10.1371/journal.pone.0169502), 2017-01-17
Supplement: pone.0169502.s017.pdf [file pone.0169502.s017.pdf]

**S2 Table. Number of houses visited and samples collected each week among SCT-only households**

| <b>Week</b> | <b>Number of houses visited</b> | <b>Number of samples</b> |
|-------------|---------------------------------|--------------------------|
| <b>1</b>    | 29                              | 57                       |
| <b>2</b>    | 25                              | 48                       |
| <b>3</b>    | 29                              | 58                       |
| <b>4</b>    | 29                              | 58                       |
| <b>5</b>    | 27                              | 53                       |
| <b>37</b>   | 10                              | 20                       |
| <b>52</b>   | 15                              | 30                       |
