# Supplementary material for: Evaluation of a Silver-Embedded Ceramic Tablet as a Primary and Secondary Point-of-Use Water Purification Technology in Limpopo Province, S. Africa
Source: PubMed Central journal article supplement (PMC5240968; doi:10.1371/journal.pone.0169502), 2017-01-17
Supplement: pone.0169502.s018.pdf [file pone.0169502.s018.pdf]

**S3 Table. Geometric mean of bacterial reduction among all three water purifications interventions each week.**

|                                               | Total Coliform |                |                |                        | <i>E. coli</i> |                |                        |
|-----------------------------------------------|----------------|----------------|----------------|------------------------|----------------|----------------|------------------------|
|                                               | Week           | Geometric mean | Standard Error | Number of participants | Geometric mean | Standard Error | Number of participants |
| Silver Embedded Tablet                        | 1              | 60%            | 5%             | 47                     | 98%            | 2%             | 11                     |
|                                               | 2              | 85%            | 3%             | 47                     | 100%           | 0%             | 14                     |
|                                               | 3              | 80%            | 3%             | 50                     | 92%            | 5%             | 11                     |
|                                               | 4              | 69%            | 4%             | 44                     | 93%            | 4%             | 7                      |
|                                               | 5              | 72%            | 4%             | 38                     | 100%           | 0%             | 9                      |
|                                               | 37             | 78%            | 9%             | 8                      | 59%            | 26%            | 3                      |
|                                               | 52             | 81%            | 5%             | 9                      | 64%            | 13%            | 7                      |
| Ceramic Water Filter Only                     | 1              | 84%            | 5%             | 19                     | 100%           | 0%             | 14                     |
|                                               | 2              | 98%            | 1%             | 19                     | 100%           | 0%             | 11                     |
|                                               | 3              | 96%            | 3%             | 18                     | 100%           | 0%             | 9                      |
|                                               | 4              | 85%            | 5%             | 18                     | 100%           | 0%             | 10                     |
|                                               | 5              | 99%            | 1%             | 16                     | 100%           | 0%             | 6                      |
|                                               | 37             | 99%            | 1%             | 10                     | 100%           | 0%             | 7                      |
|                                               | 52             | 96%            | 3%             | 11                     | 56%            | 16%            | 7                      |
| Ceramic Water Filter + Silver Embedded Tablet | 1              | 95%            | 3%             | 21                     | 100%           | 0%             | 13                     |
|                                               | 2              | 97%            | 2%             | 21                     | 100%           | 0%             | 9                      |
|                                               | 3              | 91%            | 4%             | 16                     | 100%           | 0%             | 8                      |
|                                               | 4              | 99%            | 0%             | 21                     | 100%           | 0%             | 7                      |
|                                               | 5              | 89%            | 5%             | 15                     | 99%            | 1%             | 7                      |
|                                               | 37             | 92%            | 6%             | 9                      | 100%           | 0%             | 6                      |
|                                               | 52             | 93%            | 5%             | 7                      | 100%           | 0%             | 3                      |
