# Supplementary material for: Evaluation of a Silver-Embedded Ceramic Tablet as a Primary and Secondary Point-of-Use Water Purification Technology in Limpopo Province, S. Africa
Source: PubMed Central journal article supplement (PMC5240968; doi:10.1371/journal.pone.0169502), 2017-01-17
Supplement: pone.0169502.s019.pdf [file pone.0169502.s019.pdf]

**S4 Table. Baseline total coliform (TC) bacteria levels and water quality of samples among SCT households**

|                                                        | <b>Week</b> |           |           |           |           |           |           |  |
|--------------------------------------------------------|-------------|-----------|-----------|-----------|-----------|-----------|-----------|--|
|                                                        | <b>1</b>    | <b>2</b>  | <b>3</b>  | <b>4</b>  | <b>5</b>  | <b>37</b> | <b>52</b> |  |
| <b><u>Water Quality</u></b>                            |             |           |           |           |           |           |           |  |
| Number of Homes Showing Improvement in Water Quality   | 47 (82%)    | 41 (84%)  | 48 (86%)  | 41 (68%)  | 38 (69%)  | 8 (80%)   | 9 (60%)   |  |
| Number of Homes Showing a Decline in Water Quality     | 9 (16%)     | 4 (8%)    | 8 (14%)   | 16 (27%)  | 14 (25%)  | 2 (20%)   | 6 (40%)   |  |
| <b><u>Number of Homes with Baseline TC levels:</u></b> |             |           |           |           |           |           |           |  |
| Less than 10 CFU/100mL                                 | 6 (11%)     | 10 (20%)  | 7 (13%)   | 6 (10%)   | 9 (16%)   | 1 (10%)   | 0 (0%)    |  |
| From 10-49 CFU/100mL                                   | 6 (11%)     | 5 (10%)   | 9 (16%)   | 7 (12%)   | 9 (16%)   | 1 (10%)   | 7 (47%)   |  |
| 50-100 CFU/100mL                                       | 7 (12%)     | 8 (16%)   | 5 (9%)    | 8 (13%)   | 13 (24%)  | 4 (40%)   | 3 (20%)   |  |
| More than 100 CFU/100mL                                | 38 (67%)    | 26 (53%)  | 30 (54%)  | 39 (65%)  | 25 (45%)  | 4 (40%)   | 5 (33%)   |  |
| <b>Total number of samples</b>                         | <b>57</b>   | <b>49</b> | <b>56</b> | <b>60</b> | <b>55</b> | <b>10</b> | <b>15</b> |  |
