# Supplementary material for: Evaluation of a Silver-Embedded Ceramic Tablet as a Primary and Secondary Point-of-Use Water Purification Technology in Limpopo Province, S. Africa
Source: PubMed Central journal article supplement (PMC5240968; doi:10.1371/journal.pone.0169502), 2017-01-17
Supplement: pone.0169502.s020.pdf [file pone.0169502.s020.pdf]

**S5 Table. Demographic Data**

| <b>Head of household</b>                 |     |
|------------------------------------------|-----|
| Median Age                               | 44  |
| Gender                                   |     |
| Male                                     | 8%  |
| Female                                   | 92% |
| Average number of adults per household   | 2   |
| Average number of children per household | 3   |
| <b>Education</b>                         |     |
| Primary                                  | 22% |
| Secondary                                | 62% |
| University                               | 16% |
| <b>Monthly Income</b>                    |     |
| Less than R250                           | 7%  |
| R250-1500                                | 67% |
| Greater than R1500                       | 26% |
