# Supplementary material for: Evaluation of a Silver-Embedded Ceramic Tablet as a Primary and Secondary Point-of-Use Water Purification Technology in Limpopo Province, S. Africa
Source: PubMed Central journal article supplement (PMC5240968; doi:10.1371/journal.pone.0169502), 2017-01-17
Supplement: pone.0169502.s021.pdf [file pone.0169502.s021.pdf]

**S6 Table. Water practices**

| <b>Primary Water Source</b>                     |     |
|-------------------------------------------------|-----|
| Piped into yard                                 | 22% |
| Public tap/standpipe                            | 55% |
| Borehole                                        | 18% |
| Surface water                                   | 5%  |
| <b>Water storage vessel</b>                     |     |
| Jerry can                                       | 35% |
| Plastic bucket (20-25 L)                        | 34% |
| Water tank                                      | 1%  |
| Plastic Drum (200 L)                            | 22% |
| Plastic bottle                                  | 8%  |
| <b>Where is water stored in home</b>            |     |
| Inside                                          | 95% |
| Outside                                         | 5%  |
| Where inside?                                   |     |
| Kitchen                                         | 80% |
| <b>Cleaning method for water storage vessel</b> |     |
| Boiled water                                    | 4%  |
| Bleach                                          | 8%  |
| Soap                                            | 57% |
| Nothing                                         | 32% |
